# Supplementary material
Source: publisher figshare collection journal article supplement (https://sage.figshare.com/ndownloader/files/19146368)
Supplement: Supplementary file 1 [file 19146368]

## Sheet: Лист1
№	Patient's code	Cell Scan	CS categ.	Conv. (R-G)	Conv. categ.	Histology	Hist categ.
1	2/3/89	4	2	4	2	3	1
2	2/4/53	6	4	6	4	6	4
3	2/4/103	1	1	2	1	2	1
4	2/4/157	2	1	2	1	2	1
5	2/4/162	7	5	7	5	7	5
6	2/1/14	5	3	5	3	3	1
7	2/1/35	6	4	6	4	3	1
8	4/1/24	5	3	7	5	7	5
9	4/1/29	7	5	7	5	7	5
10	4/1/142	5	3	9	2	9	2
11	4/1/190	6	4	6	4	6	4
12	4/1/204	7	5	6	4	7	5
13	4/1/210	3	1	6	4	2	1
14	4/1/217	2	1	2	1	3	1
15	4/1/228	6	4	6	4	5	3
16	4/1/229	5	3	4	2	3	1
17	4/1/231	4	2	5	3	3	1
18	4/1/237	7	5	7	5	7	5
19	4/1/238	4	2	5	3	3	1
20	4/1/243	9	2	9	2	9	2
21	4/1/253	3	1	4	2	3	1
22	4/1/255	5	3	5	3	3	1
23	4/1/256	3	1	2	1	3	1
24	4/1/257	5	3	5	3	3	1
25	4/1/258	4	2	5	3	6	4
26	4/1/259	9	2	9	2	3	1
27	4/1/260	8	1	9	2	8	1
28	4/1/267	9	2	9	2	8	1
29	4/1/272	8	1	9	2	8	1
30	4/1/276	6	4	6	4	7	5
31	4/1/277	6	4	6	4	6	4
32	4/1/282	7	5	7	5	6	4
33	2а/2/5	7	5	7	5	7	5
34	2а/2/6	7	5	7	5	7	5
35	2а/2/7	7	5	7	5	7	5
36	2а/2/8	7	5	7	5	7	5
37	2а/3/1	7	5	0		7	5
38	2а/3/3	7	5	7	5	7	5
39	2а/4/7	7	5	7	5	7	5
40	2а/4/8	7	5	7	5	7	5
41	2а/4/11	6	4	6	4	6	4
42	2а/4/12	9	2	9	2	10	4
43	2a/4/13	6	4	6	4	6	4
44	2а/4/14	1	1	1	1	2	1
45	2а/4/15	6	4	6	4	2	1
46	2а/4/16	2	1	2	1	2	1
47	2а/4/17	1	1	2	1	2	1
48	2а/4/18	1	1	1	1	2	1
49	2а/4/19	1	1	5	3	2	1
50	2а/4/20	2	1	2	1	2	1
51	2а/4/22	1	1	1	1	2	1
52	2а/4/23	1	1	1	1	2	1
53	2а/1/3	4	2	4	2	2	1
54	2а/1/9	7	5	7	5	7	5
55	2а/1/10	7	5	7	5	7	5
56	2а/1/11	7	5	7	5	7	5
57	2а/1/12	7	5	7	5	7	5
58	2а/1/13	7	5	7	5	7	5
59	2а/1/14	7	5	7	5	7	5
60	2а/1/15	7	5	7	5	7	5
61	2а/1/16	7	5	7	5	7	5
62	2а/1/17	7	5	7	5	7	5
63	2а/1/18	6	4	7	5	7	5
64	2а/1/20	7	5	7	5	7	5
65	2а/1/21	7	5	7	5	7	5
66	2а/1/22	6	4	6	4	7	5
67	2а/1/23	6	4	6	4	7	5
68	2а/1/26	1	1	0		7	5
69	2а/1/28	4	2	7	5	7	5
70	2а/1/29	6	4	7	5	7	5
71	2а/1/30	6	4	7	5	7	5
72	2а/1/32	6	4	7	5	7	5
73	2а/1/35	7	5	7	5	7	5
74	2а/1/36	3	1	3	1	7	5
75	2а/1/37	6	4	6	4	7	5
76	2а/1/38	4	2	6	4	6	4
77	2а/1/39	4	2	5	3	7	5
78	2а/1/40	6	4	6	4	7	5
79	2а/1/41	7	5	7	5	7	5
80	2а/1/42	7	5	7	5	7	5
81	5/1/2	7	5	7	5	7	5
82	5/1/3	10	4	10	4	7	5
83	4/1/313	2	1	5	3	7	5
84	4/1/314	7	5	7	5	7	5
85	4/1/263	3	1	4	2	3	1
86	4/1/271	3	1	9	2	3	1
87	4/1/274	2	1	2	1	3	1
88	4/1/279	5	3	5	3	3	1
89	4/1/281	4	2	4	2	3	1
90	2/1/77	2	1	5	3	5	3
91	4/1/284	2	1	2	1	3	1
92	4/1/285	8	1	9	2	3	1
93	4/1/308	2	1	2	1	3	1
94	4/1/317	7	5	7	5	7	5
